# Supplementary material
Source: Springer Nature journal article supplement (https://www.springermedizin.de/resource/supplementary/12894_2013_406_MOESM1_ESM.pdf/9513486)

Cumulative incidence

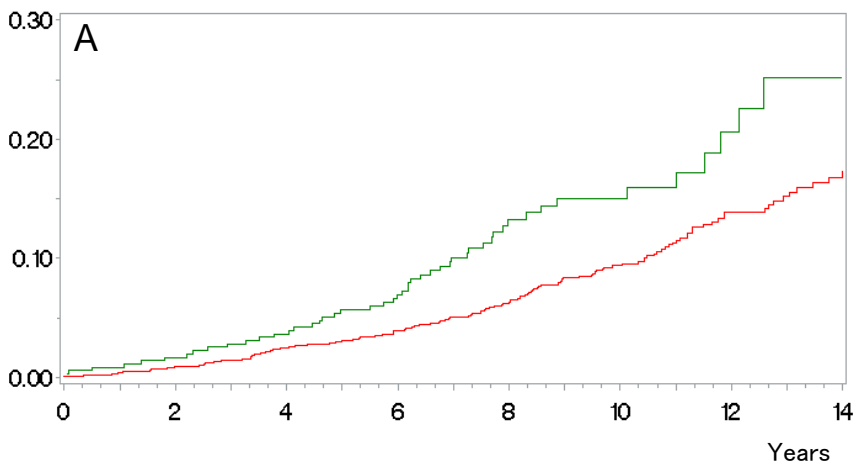

Cumulative incidence

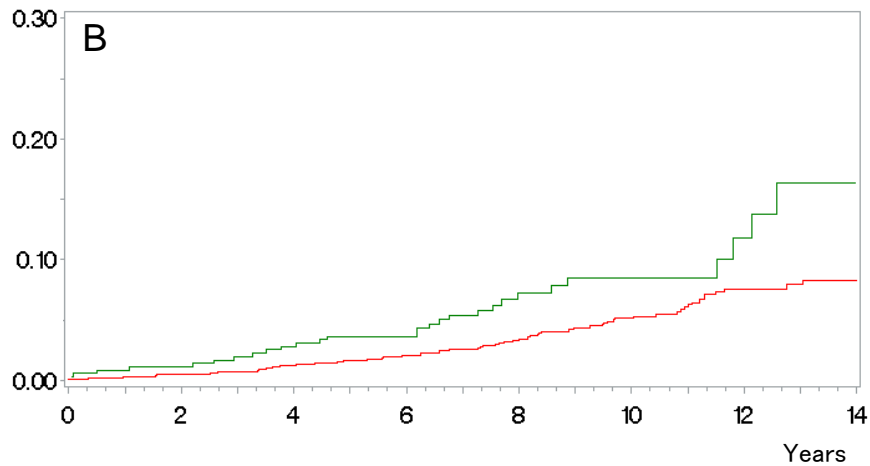

Cumulative incidence

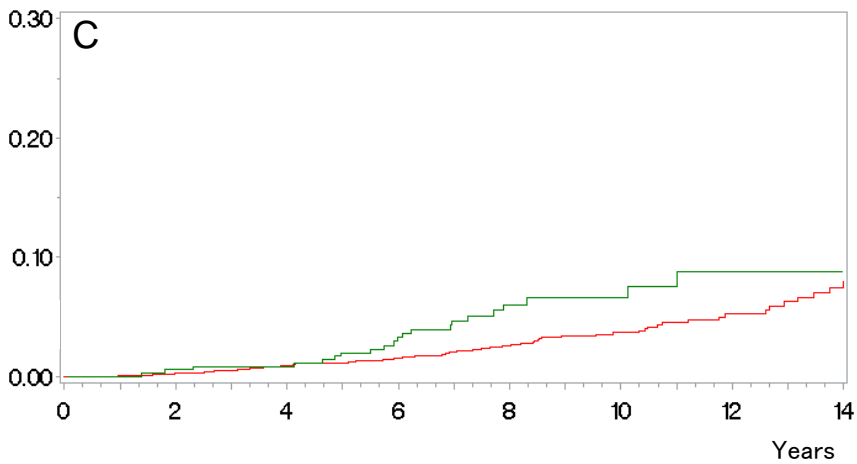

Cumulative incidence

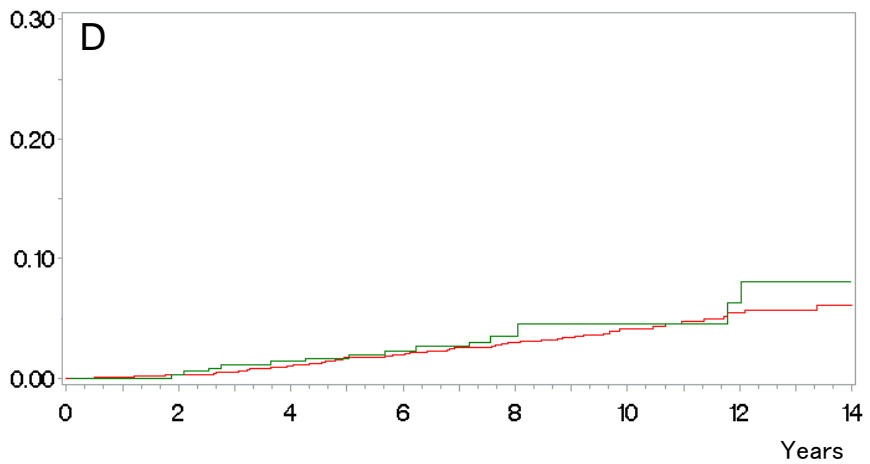

Supplement: MOESM1 [file 9513486]
